# Supplementary material for: Biodegradable dextran based microgels: a study on network associated water diffusion and enzymatic degradation
Source: Royal Society of Chemistry journal article supplement (doi:10.1039/c2sm06476f), 2012-01-01
Supplement: c2sm06476f.pdf [file c2sm06476f.pdf]

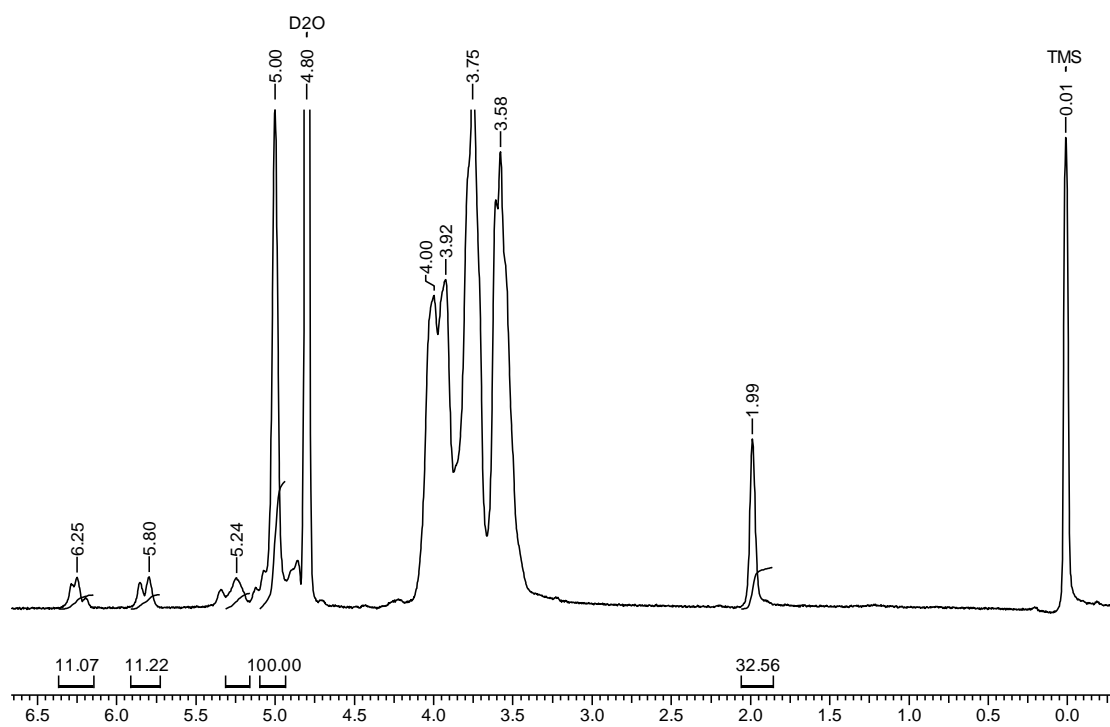

**Figure S1:**  $^1\text{H}$  NMR spectra of Dextran Methacrylate (DS = 10%).

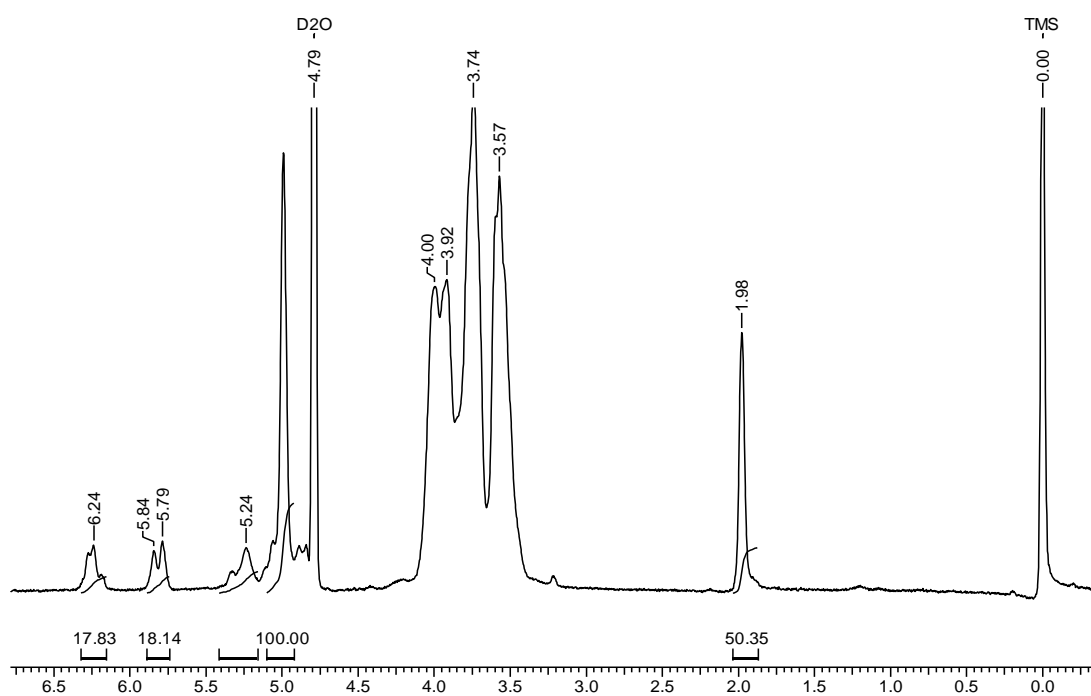

**Figure S2:**  $^1\text{H}$  NMR spectra of Dextran Methacrylate (DS = 20%).

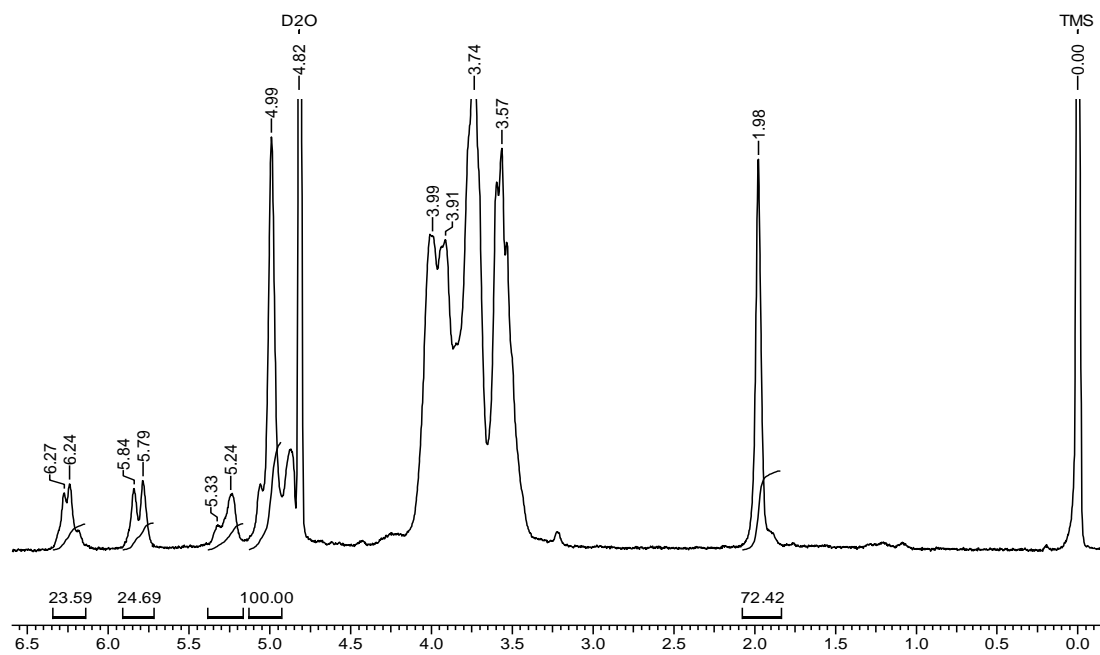

**Figure S3:**  $^1\text{H}$  NMR spectra of Dextran Methacrylate (DS = 25%).

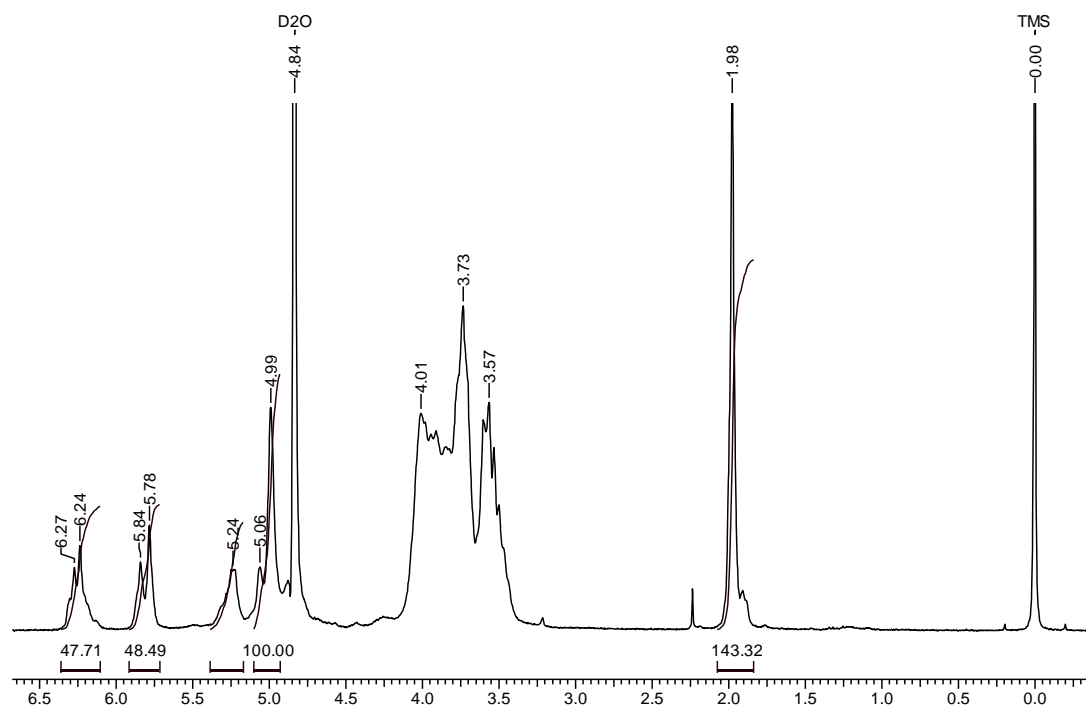

**Figure S4:**  $^1\text{H}$  NMR spectra of Dextran Methacrylate (DS = 50%).

$$DS (\%) = \frac{I_{\text{vinyl}}}{I_{\text{anomeric}}} \times 100$$

where,  $I_{\text{vinyl}}$  is the integration of the proton peak assigned to acrylate vinyl proton ( $\delta = 6.24$  ppm) and  $I_{\text{anomeric}}$  is the integration of  $-\text{CH}$  ( $\delta = 5.00$  ppm) anomeric proton peak of the dextran repeating unit.

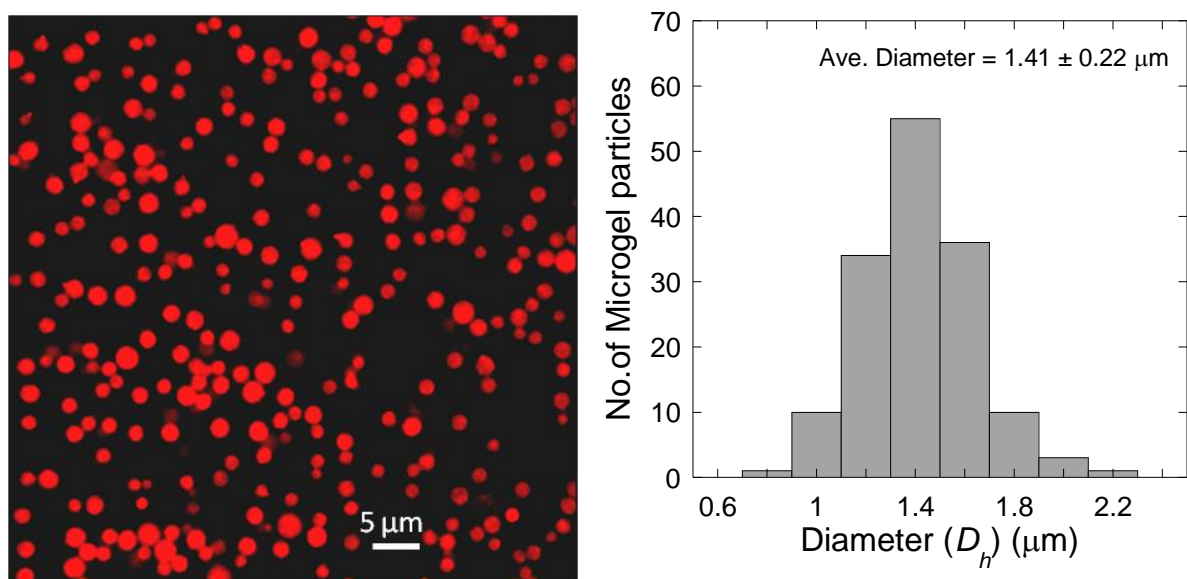

**Figure S5:** CLSM image and size distribution of DexM20 (DS 18%).

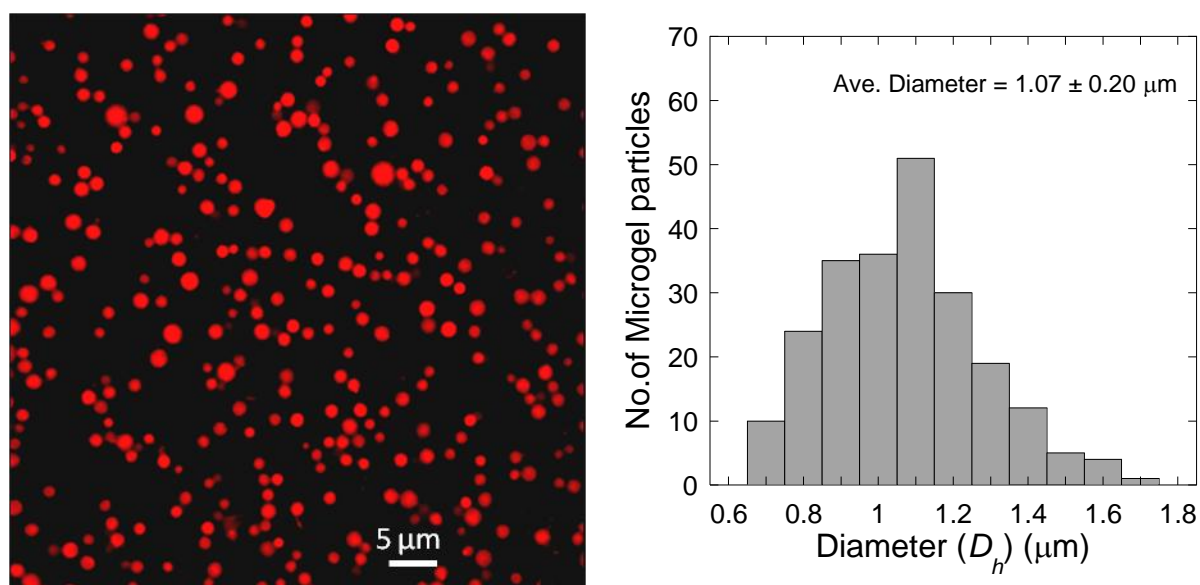

**Figure S6:** CLSM image and size distribution of DexM25 (DS 25%).

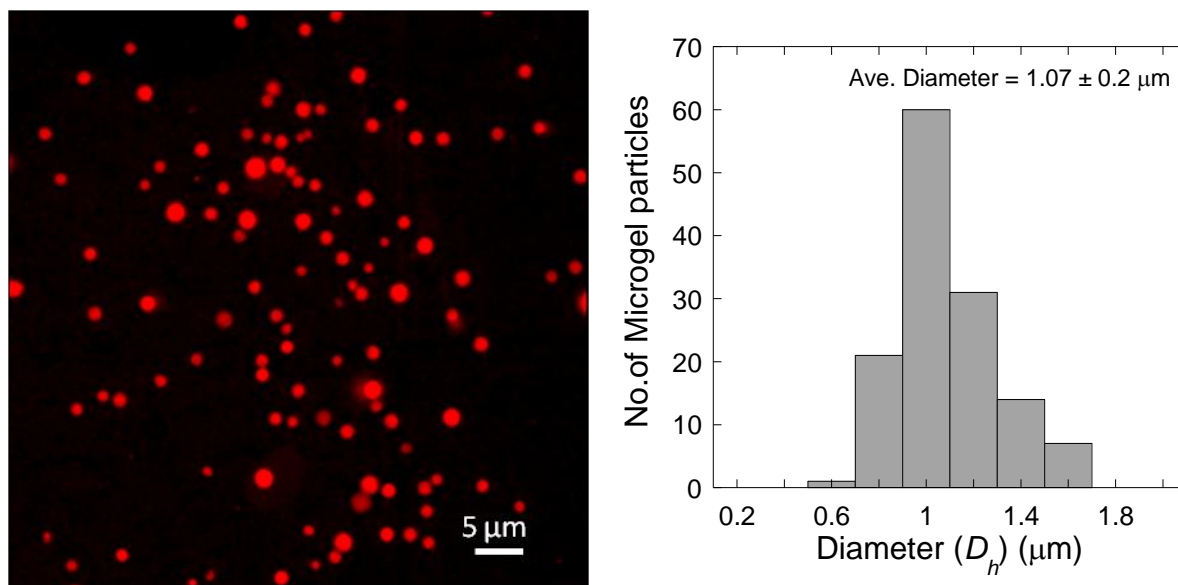

**Figure S7:** CLSM image and size distribution of DexM50 (DS 48%).

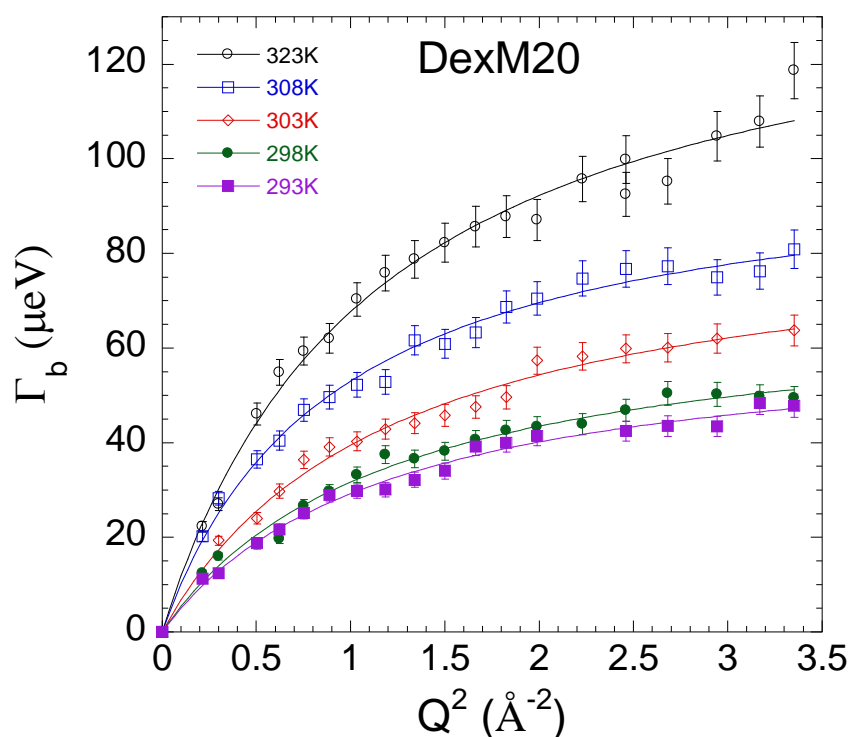

**Figure S8:** Q-dependence of the line broadening  $\Gamma_b$  of the Lorentzian,  $L_b$ , describing the diffusion of “slow” water molecules in the dextran based microgels DexM20 from 293 to 323 K.

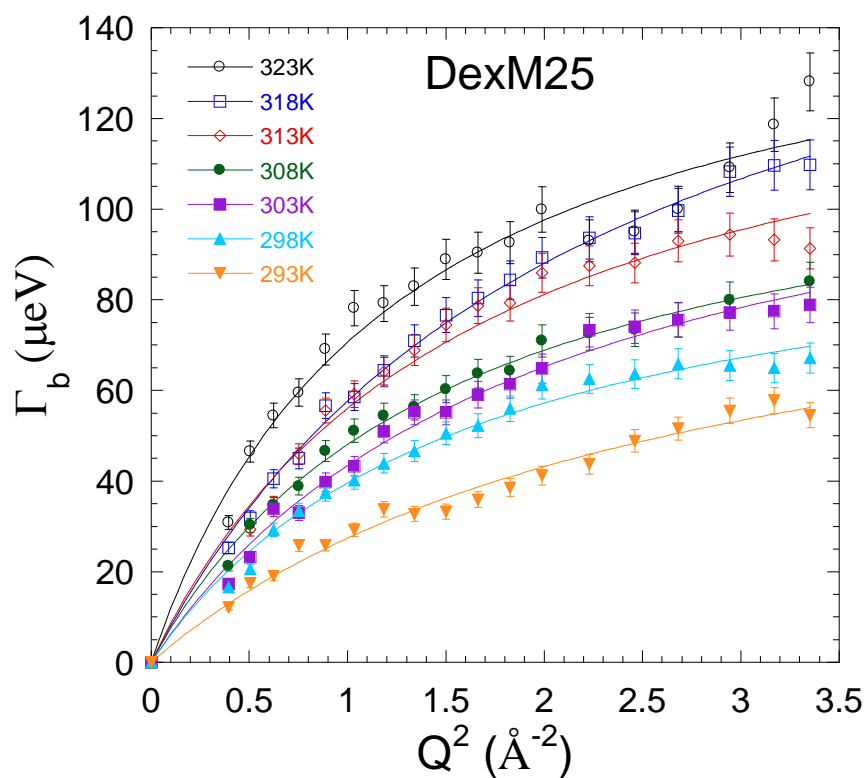

**Figure S9:** Q-dependence of the line broadening  $\Gamma_b$  of the Lorentzian,  $L_b$ , describing the diffusion of “slow” water molecules in the dextran based microgels DexM25 from 293 to 323 K.

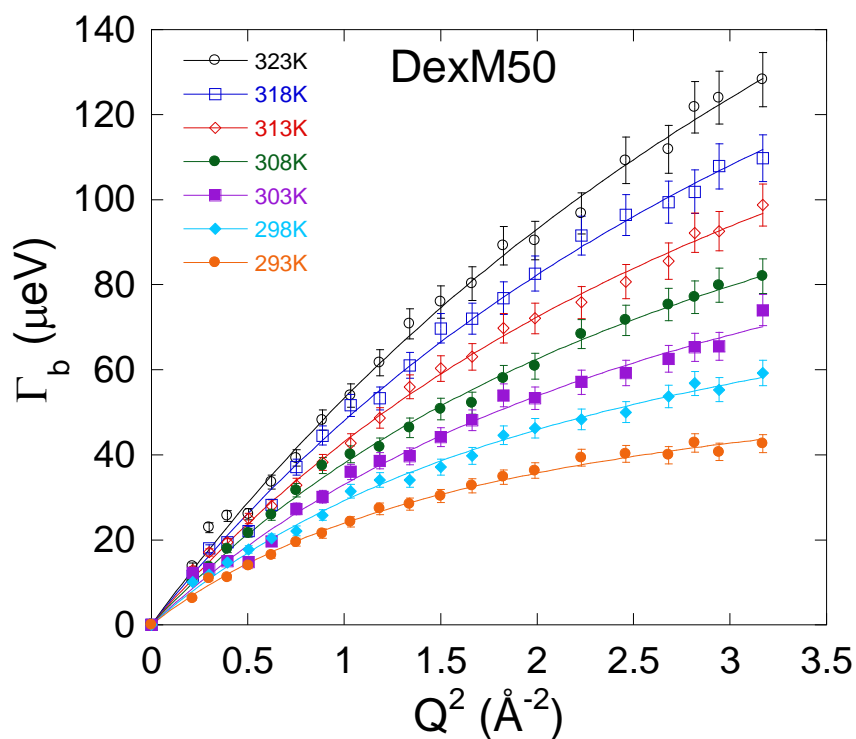

**Figure S10:** Q-dependence of the line broadening  $\Gamma_b$  of the Lorentzian,  $L_b$ , describing the diffusion of “slow” water molecules in the dextran based microgels DexM50 from 293 to 323 K.

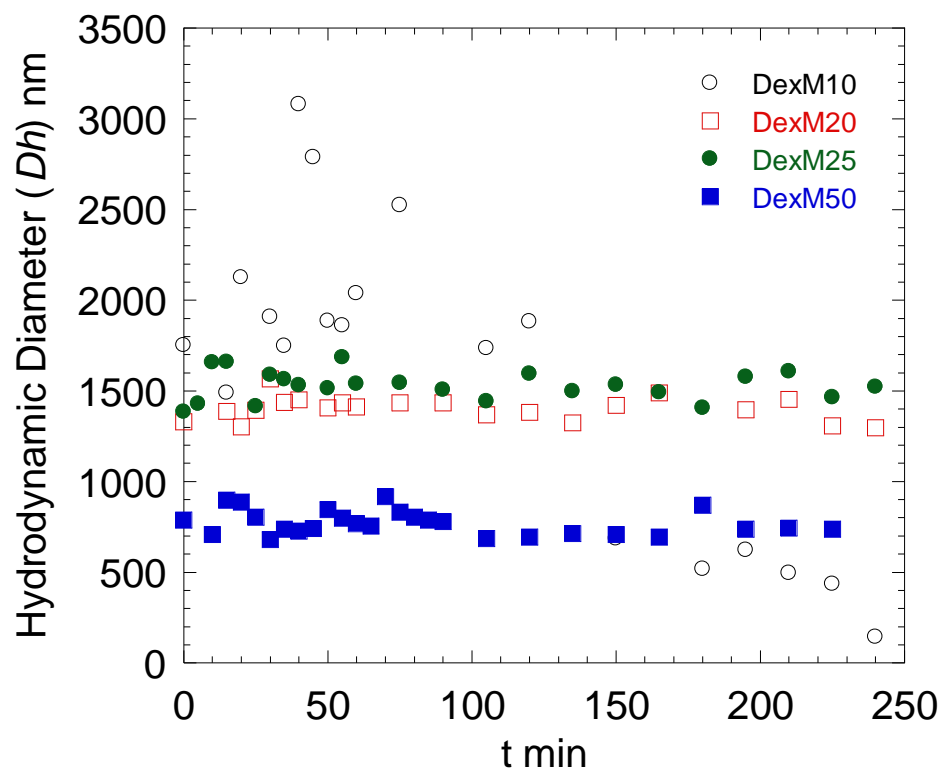

**Figure S11:** Microgel enzymatic degradation monitored by dynamic light scattering of DexM10 ( $\circ$ ), DexM20 ( $\square$ ), DexM25 ( $\bullet$ ) and DexM50 ( $\blacksquare$ ).
